# Supplementary material for: The Pseudomonas aeruginosa Type III Secretion System Exoenzyme Effector ExoU Induces Mitochondrial Damage in a Murine Bone Marrow-Derived Macrophage Infection Model
Source: PubMed Central journal article supplement (PMC8929383; doi:10.1128/iai.00470-21), 2022-03-17
Supplement: iai.00470-21-s0001.pdf [file iai.00470-21-s0001.pdf]

# **The *Pseudomonas aeruginosa* type III secretion system exoenzyme effector ExoU induces mitochondrial damage in a murine bone marrow derived macrophage infection model**

Kierra S. Hardy<sup>1,2</sup>, Amanda N. Tuckey<sup>1,2</sup>, Nicole A. Housley<sup>1,2</sup>, Joel Andrews<sup>3</sup>, Mita Patel<sup>4</sup>, Abu-Bakr Al-Mehdi<sup>4</sup>, Robert A. Barrington<sup>1,2</sup>, Suzanne L. Cassel<sup>5</sup>, Fayyaz S. Sutterwala<sup>5</sup>, and Jonathon P. Audia<sup>1,2,6</sup>

Department of Microbiology and Immunology<sup>1</sup>; Center for Lung Biology<sup>2</sup>; Mitchell Cancer Institute<sup>3</sup>; Department of Pharmacology<sup>4</sup>; University of South Alabama College of Medicine, Mobile, AL USA

Women's Guild Lung Institute, Department of Medicine, Cedars-Sinai Medical Center, Los Angeles, CA USA<sup>5</sup>

<sup>6</sup>Corresponding Author: Jonathon P. Audia, University of South Alabama College of Medicine, Medical Sciences Building, 5851 USA North Drive, Mobile, AL 36688, 251-460-6929, [jaudia@southalabama.edu](mailto:jaudia@southalabama.edu)

Running title: *Pseudomonas aeruginosa* ExoU targets host mitochondria

Key words: *Pseudomonas aeruginosa*, ExoU, ExoT, NLRC4 inflammasome, caspase-1, mitochondria, pneumonia, sepsis

# Supplemental Figure 1

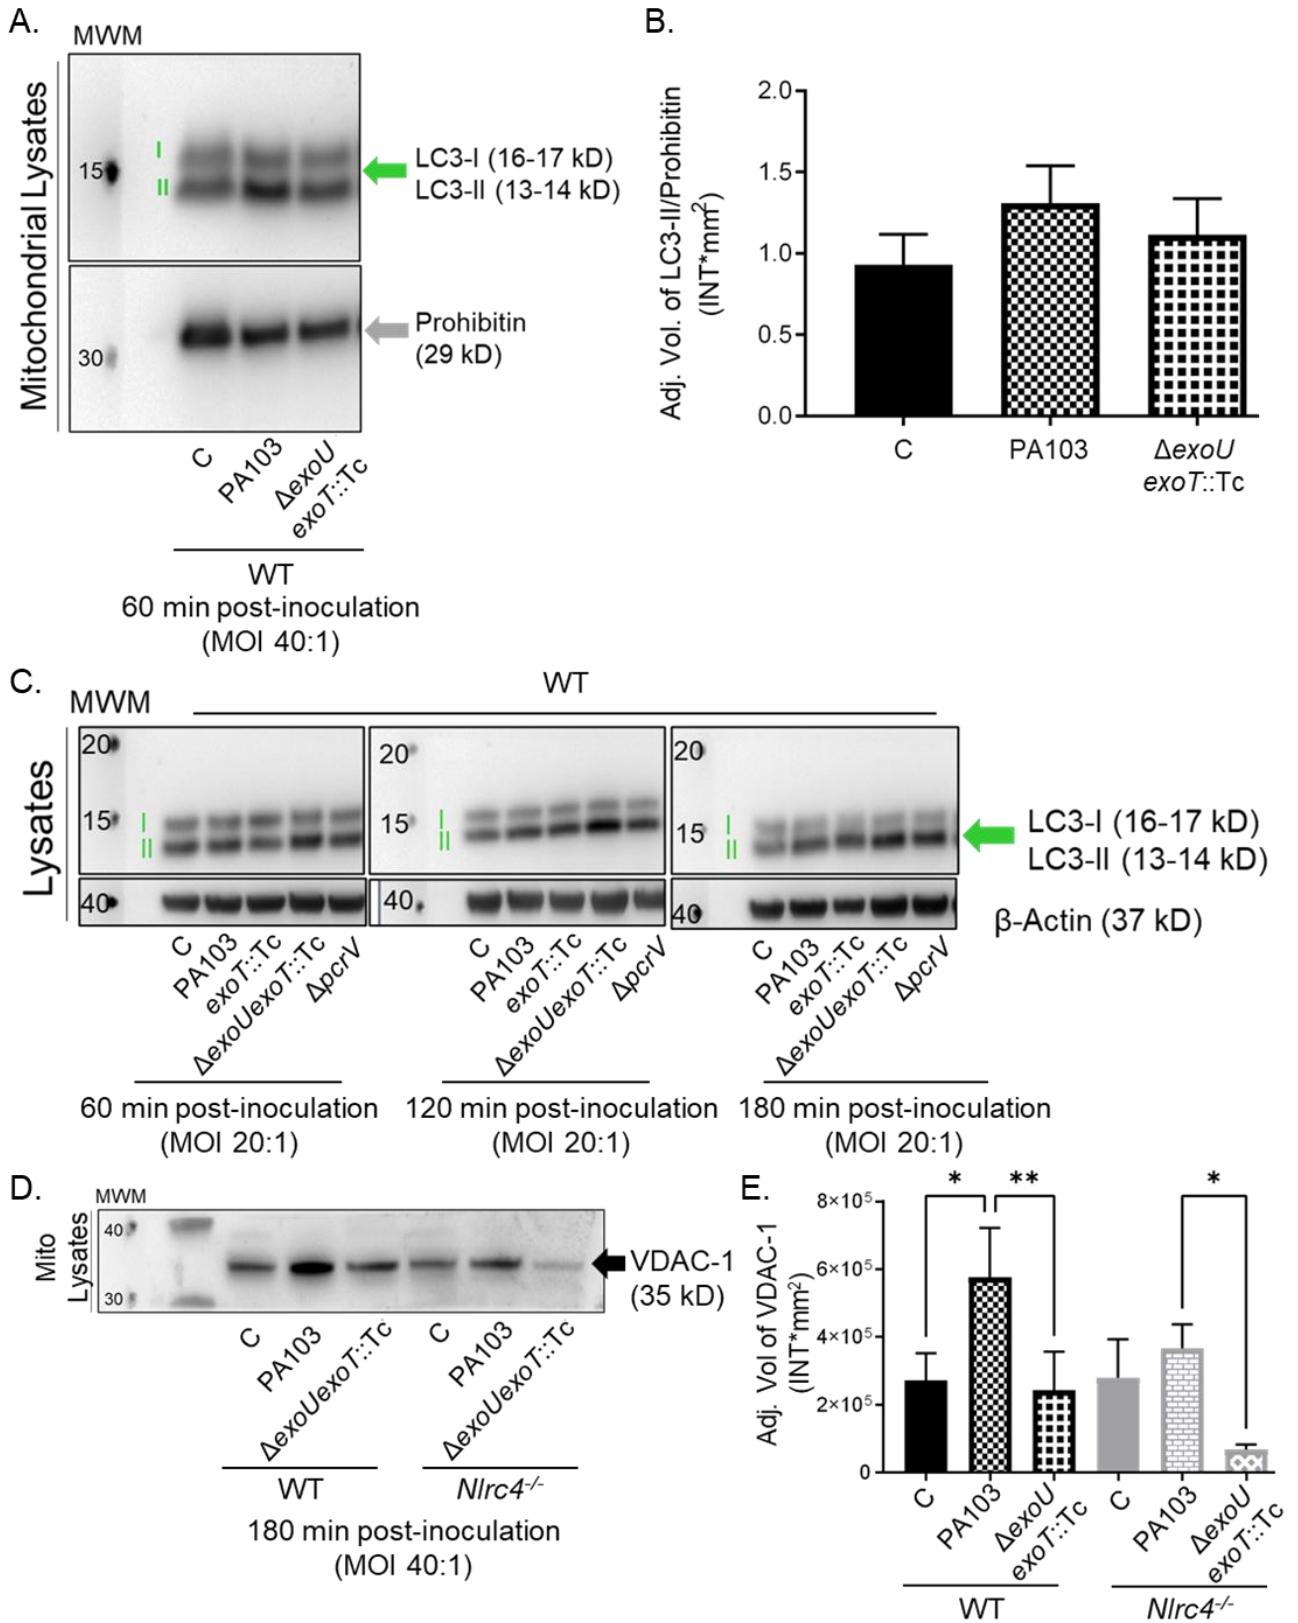

**FIGURE S1. A)** WT BMDMs were treated with sterile saline (C) or inoculated with *P. aeruginosa* strains PA103 or PA103 ( $\Delta$ *exoU* *exoT*::Tc) (see **Table 1** for genotype information). At 60 minutes post-inoculation, enriched mitochondrial and MAM fractions were isolated, and LC3-I, LC3-II (green arrow), and Prohibitin (grey arrow) were measured in lysates by Western blot. **B)** Densitometry analysis of blots from panel **A** (normalized to Prohibitin). **C)** WT BMDMs were treated with sterile saline (Ctrl) or inoculated with *P. aeruginosa* strains PA103, PA103 (*exoT*::Tc), PA103 ( $\Delta$ *exoU* *exoT*::Tc), or PA103 ( $\Delta$ *pcrV*) over a time course. LC3-I and LC3-II were measured in whole cell lysates by Western blot ( $\beta$ -actin was used as the loading control). **D)** WT and *Nlrc4*<sup>-/-</sup> BMDMs were treated with sterile saline (C) or inoculated with *P. aeruginosa* strains PA103 or PA103 ( $\Delta$ *exoU* *exoT*::Tc), and VDAC-1 (light blue arrow) measured in enriched mitochondrial and MAM extracts by Western blot. **E)** Densitometry analysis of blots from panel **D**. \*\**p* value = 0.0089, \**p* value < 0.017. MWM = molecular weight marker. Data are representative of 3 independent experiments.

# Supplemental Table 1

| Comparison of Conditions                                             | Mean Rank Diff | Significance | P value |
|----------------------------------------------------------------------|----------------|--------------|---------|
| Control (Saline) vs. $\Delta exoU$                                   | 7.635          | ns           | >0.9999 |
| Control (Saline) vs. $\Delta exoU/pExoU$                             | -68.92         | ns           | 0.9204  |
| Control (Saline) vs. $\Delta exoU/pExoU(S142A)$                      | 6.56           | ns           | >0.9999 |
| Control (Saline) vs. PA103                                           | -153.1         | ****         | <0.0001 |
| Control (Saline) vs. $\Delta exoU exoT::Tc$                          | 21.95          | ns           | >0.9999 |
| Control (Saline) vs. $exoT::Tc$                                      | -196.5         | ****         | <0.0001 |
| Control (Saline) vs. $\Delta pcrV$                                   | -48.63         | ns           | >0.9999 |
| Control (Saline) vs. $\Delta exoU exoT::Tc/pExoU$                    | -92.76         | ns           | 0.4680  |
| Control (Saline) vs. $\Delta exoU exoT::Tc/pExoU(S142A)$             | 17.7           | ns           | >0.9999 |
| $\Delta exoU$ vs. $\Delta exoU/pExoU$                                | -76.56         | *            | 0.0248  |
| $\Delta exoU$ vs. $\Delta exoU/pExoU(S142A)$                         | -1.075         | ns           | >0.9999 |
| $\Delta exoU$ vs. PA103                                              | -160.7         | ****         | <0.0001 |
| $\Delta exoU$ vs. $\Delta exoU exoT::Tc$                             | 14.32          | ns           | >0.9999 |
| $\Delta exoU$ vs. $exoT::Tc$                                         | -204.1         | ****         | <0.0001 |
| $\Delta exoU$ vs. $\Delta pcrV$                                      | -56.26         | ns           | 0.8067  |
| $\Delta exoU$ vs. $\Delta exoU exoT::Tc/pExoU$                       | -100.4         | *            | 0.0414  |
| $\Delta exoU$ vs. $\Delta exoU exoT::Tc/pExoU(S142A)$                | 10.07          | ns           | >0.9999 |
| $\Delta exoU/pExoU$ vs. $\Delta U/pExoU(S142A)$                      | 75.48          | *            | 0.0335  |
| $\Delta exoU/pExoU$ vs. PA103                                        | -84.16         | *            | 0.0218  |
| $\Delta exoU/pExoU$ vs. $\Delta exoU exoT::Tc$                       | 90.87          | ***          | 0.0010  |
| $\Delta exoU/pExoU$ vs. $exoT::Tc$                                   | -127.6         | ****         | <0.0001 |
| $\Delta exoU/pExoU$ vs. $\Delta pcrV$                                | 20.3           | ns           | >0.9999 |
| $\Delta exoU/pExoU$ vs. $\Delta exoU exoT::Tc+pExoU$                 | -23.84         | ns           | >0.9999 |
| $\Delta exoU/pExoU$ vs. $\Delta exoU exoT::Tc+pExoU(S142A)$          | 86.62          | ns           | 0.1610  |
| $\Delta exoU/pExoU(S142A)$ vs. PA103                                 | -159.6         | ****         | <0.0001 |
| $\Delta exoU/pExoU(S142A)$ vs. $\Delta exoU exoT::Tc$                | 15.39          | ns           | >0.9999 |
| $\Delta exoU/pExoU(S142A)$ vs. $exoT::Tc$                            | -203.1         | ****         | <0.0001 |
| $\Delta exoU/pExoU(S142A)$ vs. $\Delta pcrV$                         | -55.19         | ns           | 0.9601  |
| $\Delta exoU/pExoU(S142A)$ vs. $\Delta exoU exoT::Tc+pExoU$          | -99.32         | *            | 0.0499  |
| $\Delta exoU/pExoU(S142A)$ vs. $\Delta exoU exoT::Tc+pExoU(S142A)$   | 11.14          | ns           | >0.9999 |
| PA103 vs. $\Delta exoU exoT::Tc$                                     | 175            | ****         | <0.0001 |
| PA103 vs. $exoT::Tc$                                                 | -43.42         | ns           | >0.9999 |
| PA103 vs. $\Delta pcrV$                                              | 104.5          | **           | 0.0020  |
| PA103 vs. $\Delta exoU exoT::Tc/pExoU$                               | 60.32          | ns           | >0.9999 |
| PA103 vs. $\Delta exoU exoT::Tc/pExoU(S142A)$                        | 170.8          | ****         | <0.0001 |
| $\Delta exoU exoT::Tc$ vs. $exoT::Tc$                                | -218.5         | ****         | <0.0001 |
| $\Delta exoU exoT::Tc$ vs. $\Delta pcrV$                             | -70.58         | ns           | 0.0998  |
| $\Delta exoU exoT::Tc$ vs. $\Delta exoU exoT::Tc/pExoU$              | -114.7         | **           | 0.0052  |
| $\Delta exoU exoT::Tc$ vs. $\Delta exoU exoT::Tc/pExoU(S142A)$       | -4.25          | ns           | >0.9999 |
| $exoT::Tc$ vs. $\Delta pcrV$                                         | 147.9          | ****         | <0.0001 |
| $exoT::Tc$ vs. $\Delta exoU exoT::Tc/pExoU$                          | 103.7          | *            | 0.0444  |
| $exoT::Tc$ vs. $\Delta exoU exoT::Tc/pExoU(S142A)$                   | 214.2          | ****         | <0.0001 |
| $\Delta pcrV$ vs. $\Delta exoU exoT::Tc/pExoU$                       | -44.14         | ns           | >0.9999 |
| $\Delta pcrV$ vs. $\Delta exoU exoT::Tc/pExoU(S142A)$                | 66.33          | ns           | >0.9999 |
| $\Delta exoU exoT::Tc/pExoU$ vs. $\Delta exoU exoT::Tc/pExoU(S142A)$ | 110.5          | ns           | 0.1026  |
